# Supplementary material
Source: PubMed Central journal article supplement (PMC2934916)
Supplement: 01129.2009_3.pdf [file 01129.2009_3.pdf]

## SUPPLEMENTARY FIGURE LEGENDS

**Figure S1.** *A–C*, Percentage weight change induced by 900 stimulus pulses at various frequencies plotted as a function of the stimulus frequency for different values of maximal *h*-channel conductance,  $\bar{g}_h$ , with specific membrane resistivity  $R_m$  set at 80 (*A*), 160 (*B*) and 320 (*C*)  $\Omega\cdot\text{cm}^2$ . A progressive rightward shift in the curve may be noted with increases in  $\bar{g}_h$ . *D*, Quantifying the modification threshold,  $\theta_m$  as a function of  $\bar{g}_h$  shows a saturating rightward shift in the BCM-like plasticity profile with increase in  $\bar{g}_h$ , for the various values of  $R_m$ . Maximum AMPAR permeability  $\bar{P}_{AMPA}$  was set at 300 nm/s for all these simulations.

**Figure S2.** *A–B*, Percentage weight change induced by 900 stimulus pulses at various frequencies plotted as a function of the stimulus frequency for different values of maximal *h*-channel conductance,  $\bar{g}_h$ , with the initial weight  $w_{\text{init}}$  set at 0.25 (*A*) and 0.75 (*B*). A progressive rightward shift in the curve may be noted with increases in  $\bar{g}_h$ . All red arrows indicate the point at which compartment switched from generating a spike to generating a subthreshold EPSP. *C*, Quantifying the modification threshold,  $\theta_m$  as a function of  $\bar{g}_h$  shows a saturating rightward shift in the BCM-like plasticity profile with increase in  $\bar{g}_h$ , for the various values of  $w_{\text{init}}$ . *D*, It may be noted from *A*, *B* and Fig. 2A that the maximum percentage of LTP is dependent on the value of  $w_{\text{init}}$  (Shouval et al., 2002). The dependence of this maximum percentage of LTP as a function of  $w_{\text{init}}$  is nonlinear, but monotonically decreasing function (Shouval et al., 2002).
