# Supplementary material
Source: PubMed Central journal article supplement (PMC2934916)

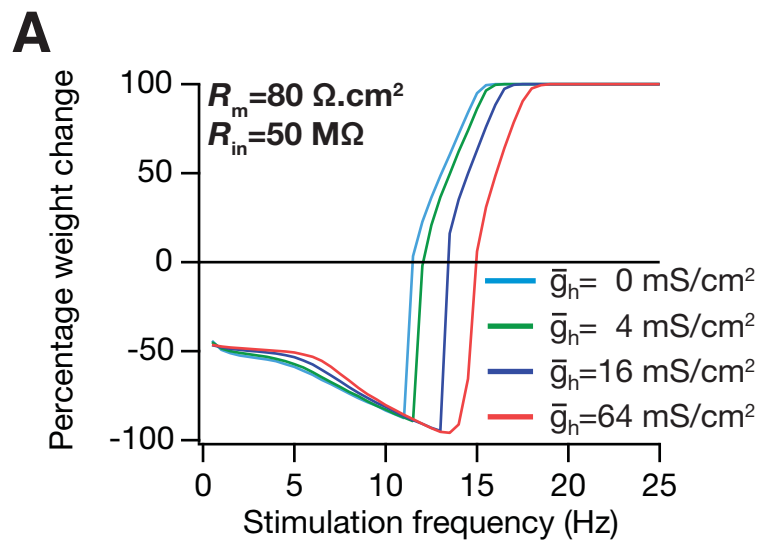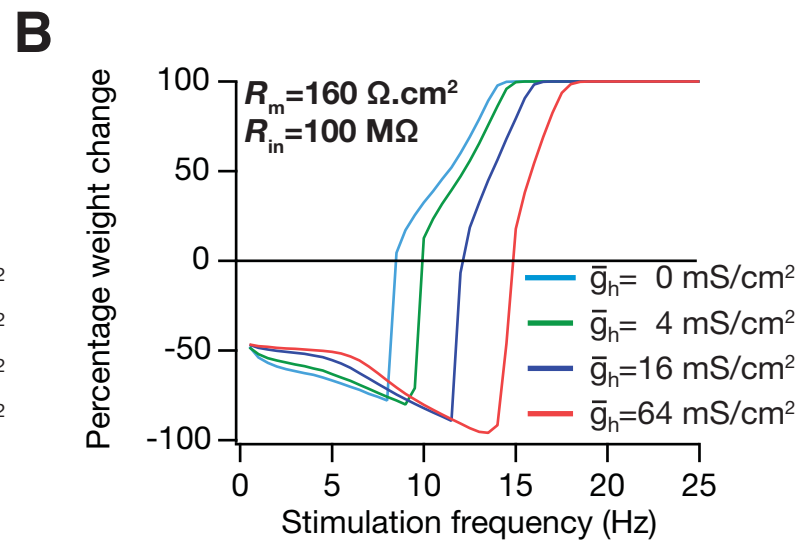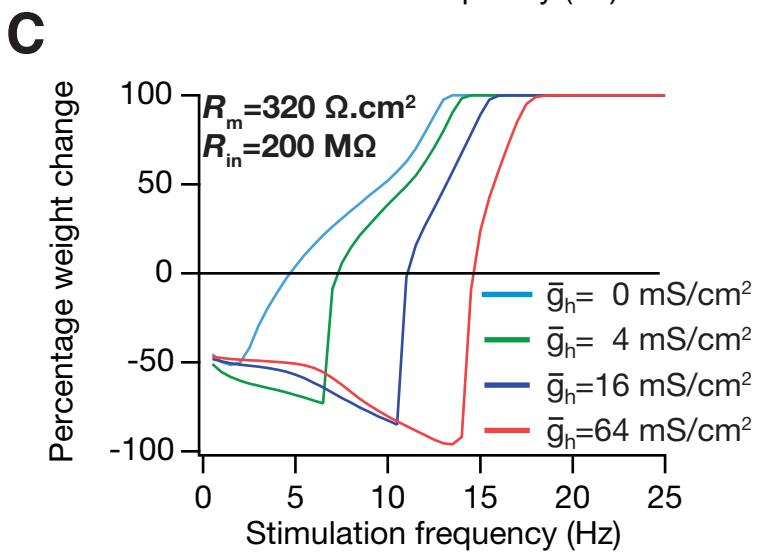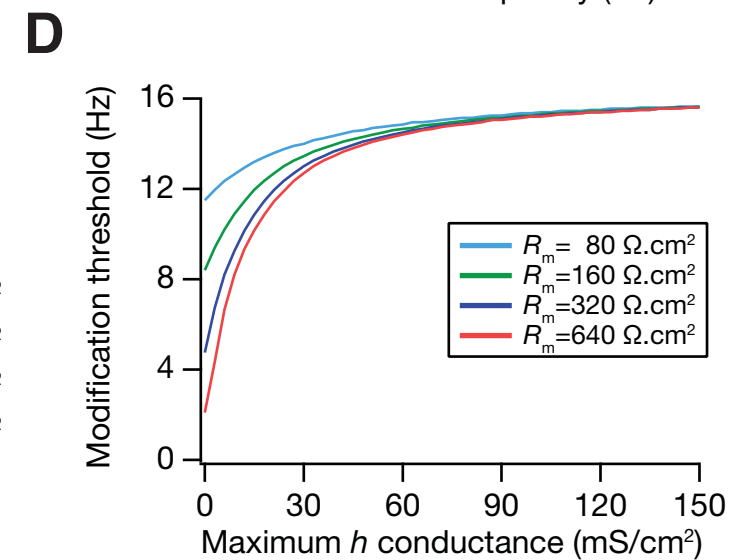

Supplement: 01129.2009_1.pdf [file 01129.2009_1.pdf]

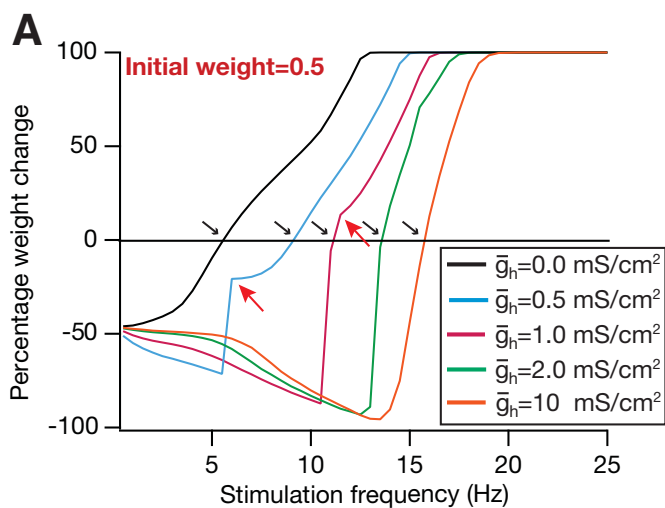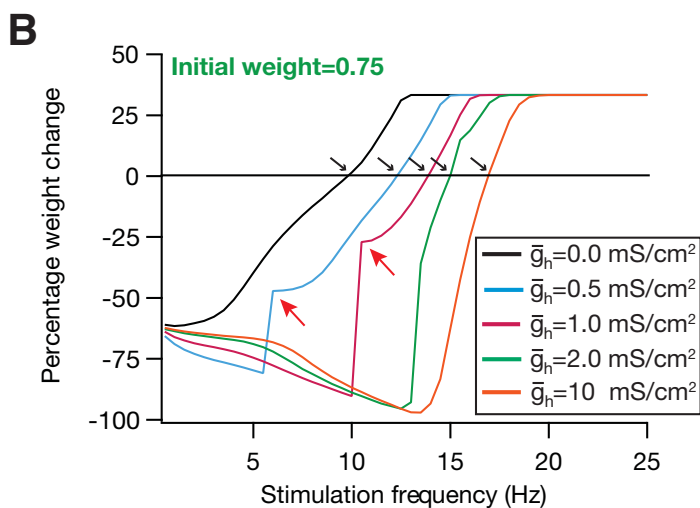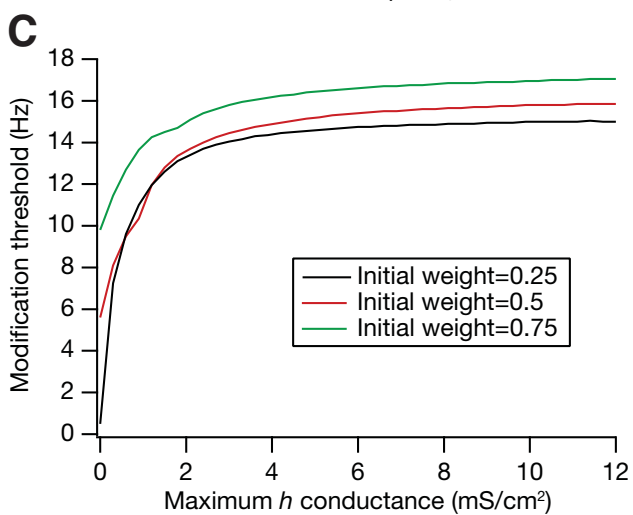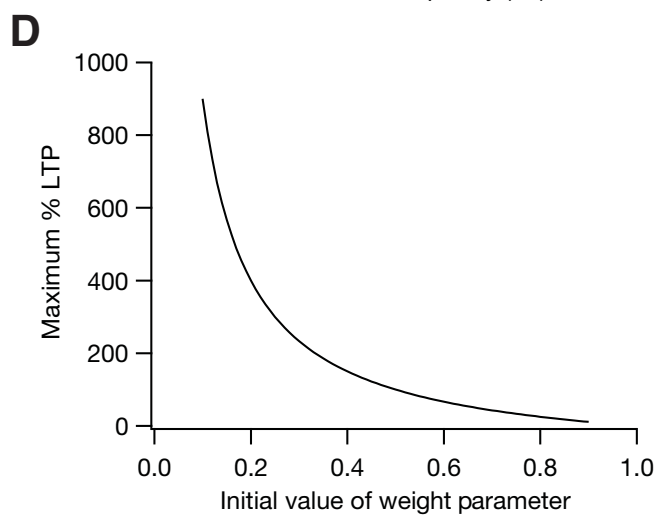

Supplement: 01129.2009_2.pdf [file 01129.2009_2.pdf]
